# Supplementary material
Source: PubMed Central journal article supplement (PMC8585727)
Supplement: NIHMS1751778-supplement-sup.pdf [file NIHMS1751778-supplement-sup.pdf]

# Homozygous *SCN1B* variants causing early infantile epileptic encephalopathy 52 affect voltage-gated sodium channel function.

Marcello Scala, Stephanie Efthymiou, Tipu Sultan, Jolien De Waele, Javeria Raza Alvi, Marta Panciroli,

Vincenzo Salpietro, Reza Maroofian, Pasquale Striano, Filip Van Petegem, Henry Houlden, Frank Bosmans

## 1. Supplementary materials and methods

### *Exome sequencing analysis*

Genomic DNA was extracted from peripheral blood leukocytes using the QIAamp DNA blood midi kit (Qiagen, Hilden, Germany) and analyzed as previously described.<sup>1</sup> GERP score was calculated as described in<sup>2</sup>.

### *Two-electrode voltage-clamp recording from *Xenopus* oocytes*

Human (h) hNa<sub>v</sub>1.1 (NM\_001165963.1), hNa<sub>v</sub>1.2 (NM\_021007.2), hNa<sub>v</sub>1.6 (NM\_014191.3), and hβ1 (NM\_001037.5) were expressed in *Xenopus laevis* oocytes (Nasco®, USA) as previously described.<sup>3</sup> To check for undesired rearrangement events, the DNA sequence of all constructs<sup>3</sup> was confirmed by automated DNA sequencing before further usage. cRNA was synthesized using T7 mMESSAGE-mMACHINE® kit (ThermoFisher Scientific, USA) after the DNA had been linearized with the appropriate restriction enzymes. hNa<sub>v</sub> channel constructs were expressed in *Xenopus* oocytes together with hβ1-subunit (1:5 molar ratio) and electrophysiological recordings (OC-725C, Warner Instruments, USA) were taken 1–3 days post cRNA injection. Oocytes were maintained at 17°C in Barth's medium (88 mM NaCl, 1 mM KCl, 5 mM HEPES, 2.4 mM NaHCO<sub>3</sub>, 0.41 mM CaCl<sub>2</sub>, 0.82 mM MgSO<sub>4</sub>, 0.33 mM Ca(NO<sub>3</sub>)<sub>2</sub>, and 50 µg/mL gentamycin (pH 7.4) with NaOH) and studied using the two-electrode voltage-clamp recording technique (OC-725C, Warner Instruments, USA) with a 150 µl recording chamber. All data were filtered at 4 kHz and digitized at 20 kHz using pClamp10 software (Molecular Devices, USA). Microelectrode resistances were 0.5–1 MΩ when the devices were filled with 3 M KCl. The external recording solution contained 100 mM NaCl, 5 mM HEPES, 1 mM MgCl<sub>2</sub>, and 1.8 mM CaCl<sub>2</sub> (pH 7.6) with NaOH. All experiments were performed at room temperature (RT) (~21 °C). Leak and background conductances, identified by blocking Na<sub>v</sub> channels with tetrodotoxin (TTX), were subtracted for all of the Na<sub>v</sub> channel-mediated currents. Voltage-activation relationships were obtained by measuring peak currents and calculating conductance (G), and a Boltzmann function was fit to the data according to the equation  $G/G_{\max} = [1 + e^{-zF(V-V_{1/2})/RT}]^{-1}$ , where  $G/G_{\max}$  is the normalized conductance,  $z$  is the equivalent charge,  $V_{1/2}$  is the half-activation voltage,  $F$  is Faraday's constant,  $R$  is the gas constant, and  $T$  is the absolute temperature in kelvin. The fast inactivation time constants and RFI measurements were fit using a single exponential fit. Off-line data analysis was performed using Clampfit10 (Molecular Devices, USA), Excel (Microsoft Office, USA), Prism 4 (GraphPad, USA) and Origin 8 (OriginLab, USA).

### *Qualitative biochemical assessment of hβ1 expression in *Xenopus laevis* oocytes*

Oocytes expressing wild-type hβ1, and the described mutants were washed with saline solution and incubated overnight with 0.5 mg/ml Sulfo-NHS-LC-biotin (Pierce, USA). Pooled oocytes (50) were lysed in 10 µl/oocyte buffer H (1% Triton X-100, 100 mM NaCl, 20 mM Tris-HCl, pH 7.4) plus protease inhibitor cocktail (Sigma-Aldrich, USA) and shaken for 60 min at 4°C after which they were centrifuged at 16,200xg for 3 min. The pellet was discarded and the supernatant (SN) transferred to a fresh 1.5 ml Eppendorf® tube. 200 µl of hydrophilic streptavidin magnetic beads (New England Biolabs, USA) were then added and the sample shaken gently at 4°C overnight. Beads were washed twice with buffer H and resuspended in 40 µl buffer H, after which the biotinylated protein was dissociated through the addition of

1X loading buffer plus reducing agent (10% 2-ME, 50 mM DTT final conc.) and boiled at 95°C for 5 min to generate the surface protein fraction. 35 µl of all samples were loaded on a Novex™ WedgeWell™ 10% Tris-Glycine Mini-Gel (Thermo Fisher Scientific, USA) with Tris-Glycine running buffer and analyzed by Western analysis. Nitrocellulose membranes were probed overnight at 4°C with 1:1000 rabbit anti-SCN1B antibody as primary (Cell Signaling Technologies, USA) and for 60 min at room temperature with 1:5000 goat anti-rabbit HRP-conjugated antibody as secondary (Abcam, United Kingdom). Membranes were incubated for 5 min with Clarity Max Western ECL Substrate (Bio-Rad Laboratories, USA) before imaging.

### *Statistical analysis*

Significance of all normalized G-V and steady-state inactivation (I-V) relationships was analyzed using two-way analysis of variance (ANOVA) with post-hoc Bonferroni correction. Individual time point values for fast inactivation time constants ( $\tau$ ) and recovery from fast inactivation (RFI) were analyzed using two-way Student's *t*-test. For data presented in Supplemental Tables, Student's *t*-test (unpaired) against h $\beta$ 1-subunit was used. Values in all cases reflect the mean and error bars reflect standard error of the mean (S.E.M.);  $p < 0.05$  (\*), 0.01 (\*\*), or 0.001 (#). All statistical analysis was carried out using Excel (Microsoft, USA) and Prism 4 (GraphPad, USA).

## **2. Supplementary clinical information**

### *Family A*

This is a consanguineous family of Pakistani ancestry. Family history was negative for epileptic disorders but was remarkable because of four miscarriages, occurring before the birth of the two affected siblings. Patient 1 is a 9-year-old male regularly achieving the developmental milestones in the first 6 months of life. At the age of 6 months, he started to suffer from myoclonic and generalized tonic-clonic seizures (GTCS). These seizures were more common during sleep at night and were refractory to carbamazepine and clonazepam. EEG showed a diffuse slowing of background associated with multifocal epileptiform abnormalities. Subsequently, a developmental stagnation followed by a true psychomotor regression was observed at the age of 3 years. The child lacked speech and social interaction. Physical examination revealed generalized spasticity and hyperreflexia. Patient 2 is a 5-year-old female with a similar clinical course. After a regular psychomotor development, she started to suffer from recurrent GTCS and myoclonic seizures, followed by developmental stagnation and regression. EEG was consistent with diffuse encephalopathy. Seizures remained intractable despite the use of several antiepileptic drugs (AEDs) such as carbamazepine and clonazepam. Physical examination revealed intellectual disability, generalized spasticity, and hyperreflexia.

### *Family B*

This is a consanguineous family of Pakistani ancestry with a negative family history for epileptic disorders. Patient 3 is a 10-year-old female. She was diagnosed with psychomotor delay at the age of 5 years, when she started to suffer from generalized tonic-clonic seizures. Each tonic-clonic seizure lasted about 3-5 minutes. At the age of 9, she started to suffer from clonic jerks during sleep and to wake up screaming during the seizure. These episodes lasted around 1 minute. Seizures poorly responded to levetiracetam, valproic acid, and clobazam. The maximum seizure-free period was 1 month. Currently, the patient has intellectual disability with a severe speech delay (she can only say 3-4 words), but is able to walk with some physical restrictions. Patient 4 is a 9-year-old male. He had a history of psychomotor delay in the first months of life and started to suffer from febrile seizures at the age of 5 months. At the same age, he also had afebrile tonic and tonic-clonic seizures. Despite the employment of several AEDs, seizures were refractory and poorly responded to carbamazepine and valproic acid. Currently, he has intellectual disability with a severe speech impairment (he is able to say 2-3 meaningful words) and he can walk only if supported. Patient 5 is a 5-year-old male with a diagnosis of developmental delay in the first months of life. At the age of 6 months, he started to suffer from febrile seizures and later afebrile GTCS. Seizures were only partially controlled with levetiracetam, valproic acid, and clonazepam. She is currently ambulatory, with

preserved cognitive functions but absent speech. In all patients (patients 3-5), EEG revealed multifocal epileptic discharges.

#### *Family C*

This is a consanguineous family of Pakistani ancestry. Family history was negative for epileptic disorders. The first-born was a healthy female, whereas the second- (patient 6) and third-born (patient 7) were both affected. Both patient 6 and 7 were diagnosed with psychomotor delay in the first months of life and started to suffer from recurrent seizures by the age of 6 months. Seizures resulted refractory to several AEDs. Both patients experienced a developmental stagnation followed by psychomotor regression. They prematurely died due to clinical complications associated with refractory epilepsy at the age of 2 years (patient 6) and 7 months (patient 7).

#### *Family D*

This is a consanguineous family of Pakistani ancestry with a negative family history for epileptic disorders. The first-born was an apparently healthy female prematurely deceased due to unknown reason. The second-born is a healthy male. Patient 8 started to suffer from clonic seizures during the neonatal period (20 days of life). Subsequently, febrile seizures and multifocal tonic-clonic seizures (MFTCS) with post-ictal drowsiness were observed, with each MFTCS episode lasting from 2-3 minutes to 2 hours and requiring intravenous administration of diazepam. She also developed myoclonic seizures. Seizure were refractory to several AEDs, including phenobarbitone, levetiracetam, valproic acid, and topiramate. She had severe cognitive impairment, being nonverbal and able to walk only if supported. She died at the age of 5 years after a refractory status epilepticus. Patient 9 suffered from clonic and myoclonic seizures by the age of 4 months. Seizures poorly responded to phenobarbitone, levetiracetam, and clonazepam. She had severe psychomotor delay and deceased at 1 year of age due to uncontrolled seizures.

### **3. Supplementary References**

1. Makrythanasis P, Maroofian R, Stray-Pedersen A, Musaev D, Zaki MS, Mahmoud IG, et al. Biallelic variants in KIF14 cause intellectual disability with microcephaly *Eur J Hum Genet.* 2018 Mar;26:330-339.
2. Cooper GM, Stone EA, Asimenos G, Green ED, Batzoglou S, Sidow A. Distribution and intensity of constraint in mammalian genomic sequence *Genome Res.* 2005 Jul;15:901-913.
3. Gilchrist J, Dutton S, Diaz-Bustamante M, McPherson A, Olivares N, Kalia J, et al. Nav1.1 modulation by a novel triazole compound attenuates epileptic seizures in rodents *ACS Chem Biol.* 2014 May 16;9:1204-1212.
4. Audenaert D, Claes L, Ceulemans B, Lofgren A, Van Broeckhoven C, De Jonghe P. A deletion in SCN1B is associated with febrile seizures and early-onset absence epilepsy *Neurology.* 2003 Sep 23;61:854-856.
5. Estacion M, O'Brien JE, Conravey A, Hammer MF, Waxman SG, Dib-Hajj SD, et al. A novel de novo mutation of SCN8A (Nav1.6) with enhanced channel activation in a child with epileptic encephalopathy *Neurobiol Dis.* 2014 Sep;69:117-123.
6. Fendri-Kriaa N, Kammoun F, Salem IH, Kifagi C, Mkaouar-Rebai E, Hsairi I, et al. New mutation c.374C > T and a putative disease-associated haplotype within SCN1B gene in Tunisian families with febrile seizures *Eur J Neurol.* 2011 May;18:695-702.
7. Mitta N, Menon RN, McTague A, Radhakrishnan A, Sundaram S, Cherian A, et al. Genotype-phenotype correlates of infantile-onset developmental & epileptic encephalopathy syndromes in South India: A single centre experience *Epilepsy Res.* 2020 Jun 18;166:106398.
8. Orrico A, Galli L, Grosso S, Buoni S, Pianigiani R, Balestri P, et al. Mutational analysis of the SCN1A, SCN1B and GABRG2 genes in 150 Italian patients with idiopathic childhood epilepsies *Clin Genet.* 2009 Jun;75:579-581.
9. Scheffer IE, Harkin LA, Grinton BE, Dibbens LM, Turner SJ, Zielinski MA, et al. Temporal lobe epilepsy and GEFS(+) phenotypes associated with SCN1B mutations *Brain.* 2007 Jan;130:100-109.
10. Wallace RH, Scheffer IE, Parasivam G, Barnett S, Wallace GB, Sutherland GR, et al. Generalized epilepsy with febrile seizures plus: Mutation of the sodium channel subunit SCN1B *Neurology.* 2002 May 14;58:1426-1429.

11. Wallace RH, Wang DW, Singh R, Scheffer IE, George AL, Jr., Phillips HA, et al. Febrile seizures and generalized epilepsy associated with a mutation in the Na<sup>+</sup>-channel beta1 subunit gene SCN1B Nat Genet. 1998 Aug;19:366-370.
12. Das S, Gilchrist J, Bosmans F, Van Petegem F. Binary architecture of the Nav1.2-beta2 signaling complex Elife. 2016 Feb 19;5.
13. Gilchrist J, Das S, Van Petegem F, Bosmans F. Crystallographic insights into sodium-channel modulation by the  $\beta$ 4 subunit PNAS. 2013 Feb 110(51):E5016-24.

#### 4. Supplementary Figures

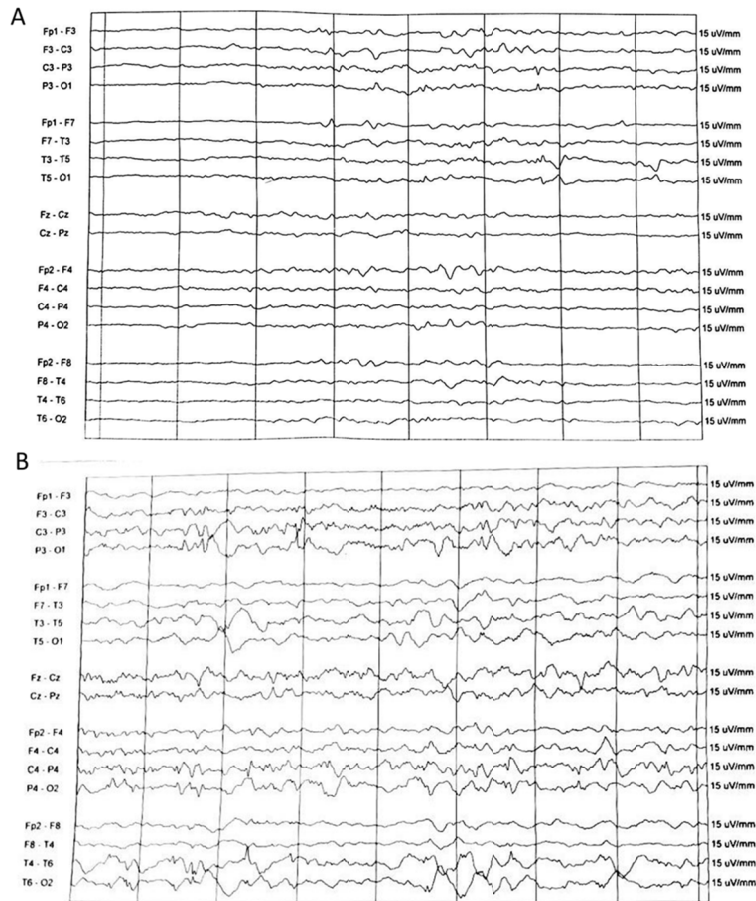

**Supplementary Figure 1.** EEG recordings in patients 3 (A) and 5 (B) showing intermixed low-voltage cerebral activity and modified suppression-burst pattern.

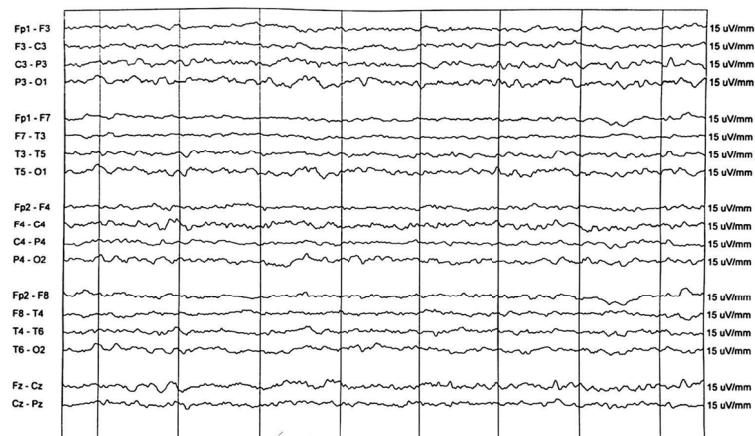

**Supplementary Figure 2.** EEG recordings in patient 8 showing globally slowed cerebral activity and theta polymorphic activity intermixed with slow-waves over the posterior regions.

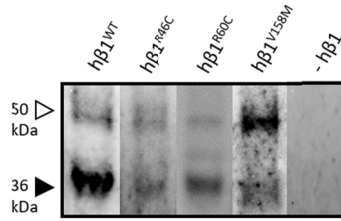

**Supplementary Figure 3.** Cell membrane insertion of WT  $\beta 1$  and  $\beta 1$  mutants using Western blot analysis by probing for  $\beta 1$  protein combined with primary amine biotinylation of surface proteins. Arrowheads indicate masses of detected protein. Observed bands indicate  $\beta 1$  protein, possibly in different glycosylated states as observed previously. (12, 13) Bands were absent in uninjected oocytes illustrating specificity.

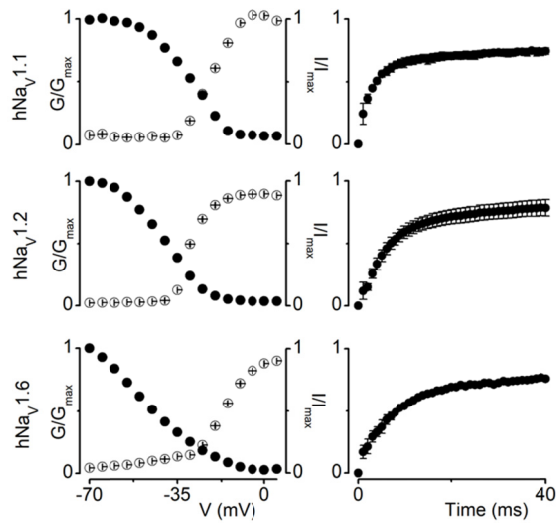

**Supplementary Figure 4.** Left, normalized G-V (open circles) and channel availability (filled circles) relationships elicited by 50 ms depolarizations from -90 mV. Right, normalized RFI measured over a 40ms timeframe using a double-pulse protocol to the maximum current of the corresponding G-V curve. Error bars reflect S.E.M. with  $n = 5-6$ .

## 5. Supplementary Tables

**Supplementary Table 1.** Summary of electroclinical features of patients with EIEE52

Abbreviations: AEM, abnormal eye movements; AP, aspiration pneumonia; AS, absence seizure; CS, clonic seizures; DS, discognitive seizures; FFA, Fenfluramine; FS, febrile seizures; GTCS, generalized tonic-clonic seizures; Hom, homozygous; HS, hemiclonic seizures; MFTCS, multifocal tonic-clonic seizures; mo, months; MS, myoclonic seizures; NA, not available; SE, status epilepticus; TS, tonic seizures; y, years.

|                                              | Homozygous SCN1B variant (NM_001037.5) | Developmental delay before seizure onset | Epileptic phenotype (onset)         | Status epilepticus (age) | EEG features                                                          | Developmental stagnation/regression after seizure onset | Refractory epilepsy          | Neurological features                              | Premature death (age, cause)             |
|----------------------------------------------|----------------------------------------|------------------------------------------|-------------------------------------|--------------------------|-----------------------------------------------------------------------|---------------------------------------------------------|------------------------------|----------------------------------------------------|------------------------------------------|
| <b>Pt 1 (Family A)</b>                       | c.136C>T; p.(R46C)                     | -                                        | MS and GTCS (6 mo)                  | -                        | Slow background, multifocal epileptic abnormalities                   | +                                                       | +                            | Generalized spasticity, hyperreflexia              | -                                        |
| <b>Pt 2 (Family A)</b>                       | c.136C>T; p.(R46C)                     | -                                        | MS and GTCS (6 mo)                  | -                        | Slow background, multifocal epileptic abnormalities                   | +                                                       | +                            | Generalized spasticity, hyperreflexia              | -                                        |
| <b>Pt 3 (Family B)</b>                       | c.472G>A; p.(V158M)                    | +                                        | GTCS (5 mo)                         | -                        | Multifocal epileptic discharges                                       | +                                                       | +                            | -                                                  | -                                        |
| <b>Pt 4 (Family B)</b>                       | c.472G>A; p.(V158M)                    | +                                        | FS, TS, GTCS (5 mo)                 | -                        | Multifocal epileptic discharges                                       | +                                                       | +                            | -                                                  | -                                        |
| <b>Pt 5 (Family B)</b>                       | c.472G>A; p.(V158M)                    | +                                        | GTCS (6 mo)                         | -                        | Multifocal epileptic discharges                                       | +                                                       | +                            | -                                                  | -                                        |
| <b>Pt 6 (Family C)</b>                       | c.472G>A; p.(V158M)                    | +                                        | <6 mo                               | -                        | -                                                                     | +                                                       | +                            | Microcephaly                                       | + (2 y, NA)                              |
| <b>Pt 7 (Family C)</b>                       | c.472G>A; p.(V158M)                    | +                                        | <6 mo                               | -                        | -                                                                     | +                                                       | +                            | Microcephaly                                       | + (7 mo, NA)                             |
| <b>Pt 8 (Family D)</b>                       | c.178C>T; p.(R60C)                     | -                                        | MFTCS (20 days)                     | -                        | -                                                                     | -                                                       | +                            | -                                                  | + (5 y, SE)                              |
| <b>Pt 9 (Family D)</b>                       | c.178C>T; p.(R60C)                     | -                                        | CS, MS (4 mo)                       | -                        | -                                                                     | -                                                       | +                            | -                                                  | + (1 y, NA)                              |
| <b>Patino et al., 2009</b>                   | c.373C>T; p.(R125C)                    | -                                        | GTCS, MS, FS (3 mo)                 | -                        | Rolandic discharges                                                   | +                                                       | +                            | Hypotonia, tetrapyramidal syndrome                 | + (13 mo, AP)                            |
| <b>Ogiwara et al., 2012</b>                  | c.316A>T; p.(I106F)                    | -                                        | HS, GTCS-FS, MS, AS, DS (6 mo)      | + (13 mo)                | Generalized multifocal spike and slow waves in isolation or in bursts | +                                                       | +                            | Ataxia, pyramidal signs                            | -                                        |
| <b>Ramadan et al., 2017 (Family 1, V-4)</b>  | c.449-2A>G; p.(?)                      | +                                        | NA                                  | + (8 mo)                 | Bursts of high voltage spikes, paroxysmal delta activity              | NA                                                      | +                            | -                                                  | + (9 mo, NA)                             |
| <b>Ramadan et al., 2017 (Family 1, V-6)</b>  | c.449-2A>G; p.(?)                      | NA                                       | GTCS, AS, AEM, singultus (2 mo)     | -                        | Generalized asynchronous slowing                                      | +                                                       | +                            | Axial hypotonia, appendicular spasticity           | + (9 mo, NA)                             |
| <b>Ramadan et al., 2017 (Family 2, V-1)</b>  | c.355T>G; p.(Y119D)                    | NA                                       | NA (2 mo)                           | -                        | NA                                                                    | +                                                       | +                            | Axial hypotonia, spastic tetraplegia, microcephaly | -                                        |
| <b>Ramadan et al., 2017 (Family 2, V-2)</b>  | c.355T>G; p.(Y119D)                    | NA                                       | NA (1 mo)                           | -                        | Posterior slowing, bursts of spikes-and-waves discharges              | +                                                       | +                            | Axial hypotonia, spastic tetraplegia, microcephaly | + (8 y, NA)                              |
| <b>Ramadan et al., 2017 (Family 3, IV-1)</b> | c.449-2A>G; p.(?)                      | NA                                       | MS, GTCS (<1 mo)                    | -                        | Slow background, frequent multifocal spikes                           | +                                                       | +                            | -                                                  | + (3.5 y, esophageal varices hemorrhage) |
| <b>Ramadan et al., 2017 (Family 3, IV-4)</b> | c.449-2A>G; p.(?)                      | NA                                       | MS, GTCS (<1 mo)                    | -                        | Slow background, frequent multifocal spikes                           | +                                                       | +                            | -                                                  | + (6 y, NA)                              |
| <b>Ramadan et al., 2017 (Family 3, IV-7)</b> | c.449-2A>G; p.(?)                      | NA                                       | MS, GTCS (<1 mo)                    | -                        | Slow background, frequent multifocal spikes                           | +                                                       | +                            | -                                                  | + (13 y, NA)                             |
| <b>Aeby et al., 2019</b>                     | c.253C>T; p.(R85C)                     | +                                        | MS (2 mo)                           | + (3 mo)                 | Frequent bilateral central and temporal spikes                        | +                                                       | +, response to FFA as add-on | Diffuse hypotonia                                  | -                                        |
| <b>Mitta et al., 2020 (11)</b>               | c.77C>T; p.(S26L)                      | -                                        | MS, GTCS, FS, Focal seizures (6 mo) | -                        | NA                                                                    | +                                                       | +                            | NA                                                 | -                                        |

**Supplementary Table 2.** *In silico* analysis of all reported *SCN1B* variants.

Abbreviations: ACMG, American College of Medical Genetics and Genomics; CADD, Combined Annotation Dependent Depletion; EIEE, early infantile epileptic encephalopathy; GEFS+, generalized epilepsy with febrile seizures plus; GERP, Genomic Evolutionary Rate Profiling;; het, heterozygous; N/A, not applicable; PM, pathogenic moderate; PP, pathogenic supporting; PS, pathogenic strong; PVS, pathogenic very strong. ‡ In-house database of 15,500 control exomes. The GME, Greater Middle East Variome Project, and Iranome yielded no results.

| <i>SCN1B</i> variant [NM_001037.5] | g. (hg38)         | Origin                               | gnomAD (v2.1.1)       | gnomAD (v3)           | Ensembl      | ClinVar (GEFS+/EIEE52)                   | SIFT             | Mutation Taster        | GERP score | CADD score (hg38, v1.6) | ACMG class                               |
|------------------------------------|-------------------|--------------------------------------|-----------------------|-----------------------|--------------|------------------------------------------|------------------|------------------------|------------|-------------------------|------------------------------------------|
| c.136C>T; p.(R46C)                 | chr19:35032623C>T | This study (Family A)                | 0.000397<br>8% (1het) | -                     | rs371646049  | -                                        | Damaging (0)     | Disease causing (1)    | 3.82       | 28.7                    | Pathogenic (PS3, PM1-2, PP1, PP3-4)      |
| c.472G>A; p.(V158M)                | chr19:35039140G>A | This study (Families B, C)           | -                     | 0.000697<br>7% (1het) | rs138450474  | Uncertain significance (SCV000223616.10) | Damaging (0.015) | Disease causing (0.99) | 4.09       | 18.8                    | Pathogenic (PS3, PM2, PM5, PP1, PP3-4)   |
| c.178C>T; p.(R60C)                 | chr19:35032665C>T | This study (Family D)                | -                     | 0.001395<br>% (2het)  | -            | -                                        | Damaging (0)     | Disease causing (1)    | 3.82       | 29.5                    | Likely pathogenic (PM1-2, PP1, PP3-4)    |
| c.373C>T; p.(R125C)                | chr19:35033664C>T | Patino et al., 2009                  | 0.003186<br>% (1het)  | 0.000698<br>0% (1het) | rs1135401736 | Pathogenic (RCV000417191)                | Damaging (0)     | Disease causing (1)    | 4.22       | 31                      | Pathogenic (PS3, PM1-2, PM5, PP3, PP5)   |
| c.316A>T; p.(I106F)                | chr19:35033607A>T | Ogiwara et al., 2012                 | -                     | -                     | rs931949929  | Pathogenic (RCV000417192)                | Damaging (0.002) | Disease causing (0.99) | 4.54       | 27                      | Likely pathogenic (PM1-2, PP3, PP5)      |
| c.449-2A>G; p.(?)                  | chr19:35039115A>G | Ramadan et al., 2017 (Families 1, 3) | -                     | -                     | -            | Pathogenic (RCV000856658)                | N/A              | Disease causing (1)    | 4.09       | 22                      | Pathogenic (PVS1, PM2, PP1, PP3-4)       |
| c.355T>G; p.(Y119D)                | chr19:35033646T>G | Ramadan et al., 2017 (Family 2)      | -                     | -                     | -            | Pathogenic (RCV000856659)                | Damaging (0)     | Disease causing (0.99) | 4.22       | 29.5                    | Likely pathogenic (PM1-2, PP1, PP3-5)    |
| c.253C>T; p.(R85C)                 | chr19:35033544C>T | Aeby et al., 2019                    | -                     | -                     | rs786205830  | Likely pathogenic (RCV00050892)          | Damaging (0.003) | Disease causing (1)    | 4.54       | 27.7                    | Pathogenic (PS3, PM1-2, PM5, PP1, PP3-4) |
| c.77C>T; p.(S26L)                  | chr19:35032564C>T | Mitta et al., 2020                   | 0.000398<br>4% (1het) | 0.000697<br>9% (1het) | rs768653839  | -                                        | Damaging (0)     | Disease causing (1)    | 3.82       | 28.5                    | Likely pathogenic (PM1-2, PP3-4)         |

**Supplementary Table 3.** Effects of *hβ1* subunit variants on human Na<sub>v</sub> channel isoforms.

Statistical results of the Student's *t*-test are indicated with p-value <0.05 (\*), <0.01 (\*\*), and <0.001 (#).

|                             |                                               | hNa <sub>v</sub> 1.1 | hNa <sub>v</sub> 1.2 | hNa <sub>v</sub> 1.6 |
|-----------------------------|-----------------------------------------------|----------------------|----------------------|----------------------|
| <i>hβ1</i> <sup>WT</sup>    | activation ( <i>V</i> <sub>1/2</sub> ) (mV)   | -24,4 ± 0.3          | -26,2 ± 0.8          | -25,2 ± 0.7          |
|                             | inactivation ( <i>V</i> <sub>1/2</sub> ) (mV) | -37,9 ± 0.8          | -41,1 ± 0.6          | -53,9 ± 1.2          |
|                             | recovery ( <i>T</i> ) (ms)                    | 3,9 ± 0.2            | 4,6 ± 0.2            | 4,2 ± 0.2            |
|                             | tau (ms)                                      | 4,5 ± 2.9            | 2 ± 0.5              | 3,5 ± 0.3            |
| <i>hβ1</i> <sup>R46C</sup>  | activation ( <i>V</i> <sub>1/2</sub> ) (mV)   | -21,5 ± 0.3          | -17,4 ± 0.3**        | -20,5 ± 0.4**        |
|                             | inactivation ( <i>V</i> <sub>1/2</sub> ) (mV) | -35,2 ± 0.6*         | -35,2 ± 1.1**        | -52,9 ± 2.8          |
|                             | recovery ( <i>T</i> ) (ms)                    | 4,8 ± 0.6            | 3,5 ± 0.2            | 4,5 ± 0.1            |
|                             | tau (ms)                                      | 2,8 ± 0.3            | 2,8 ± 0.4            | 2,5 ± 0.5            |
| <i>hβ1</i> <sup>R60C</sup>  | activation ( <i>V</i> <sub>1/2</sub> ) (mV)   | -26,7 ± 0.6          | -21,6 ± 0.7*         | -17,0 ± 1.1**        |
|                             | inactivation ( <i>V</i> <sub>1/2</sub> ) (mV) | -41,5 ± 0.4          | -30,6 ± 1.3#         | -50,7 ± 0.4          |
|                             | recovery ( <i>T</i> ) (ms)                    | 2,5 ± 0.1            | 4,7 ± 0.2            | 5,1 ± 0.1            |
|                             | tau (ms)                                      | 5,5 ± 0.8            | 0,7 ± 0.2*           | 6,2 ± 0.5            |
| <i>hβ1</i> <sup>V158M</sup> | activation ( <i>V</i> <sub>1/2</sub> ) (mV)   | -22,8 ± 0.4          | -22,1 ± 0.7          | -19,6 ± 0.8#         |
|                             | inactivation ( <i>V</i> <sub>1/2</sub> ) (mV) | -34,8 ± 0.6*         | -38,8 ± 0.8          | -51,6 ± 0.4*         |
|                             | recovery ( <i>T</i> ) (ms)                    | 7,6 ± 0.6**          | 3,5 ± 0.1            | 4,2 ± 0.2            |
|                             | tau (ms)                                      | 3,2 ± 0.4            | 6,0 ± 5.4            | 1,7 ± 0.1            |
| No <i>hβ1</i>               | activation ( <i>V</i> <sub>1/2</sub> ) (mV)   | -22,3 ± 1.4          | -30,0 ± 0.7          | -16,8 ± 0.7          |
|                             | inactivation ( <i>V</i> <sub>1/2</sub> ) (mV) | -30,6 ± 1.2          | -40,4 ± 0.7          | -49,3 ± 1.8          |
|                             | recovery ( <i>T</i> ) (ms)                    | 2,3 ± 0.2            | 4,9 ± 0.2            | 5 ± 0.3              |
